# Supplementary material
Source: publisher figshare collection journal article supplement (https://karger.figshare.com/ndownloader/files/25659452)
Supplement: Supplementary file 1 [file 25659452]

**Supplemental Figure 2.**

**
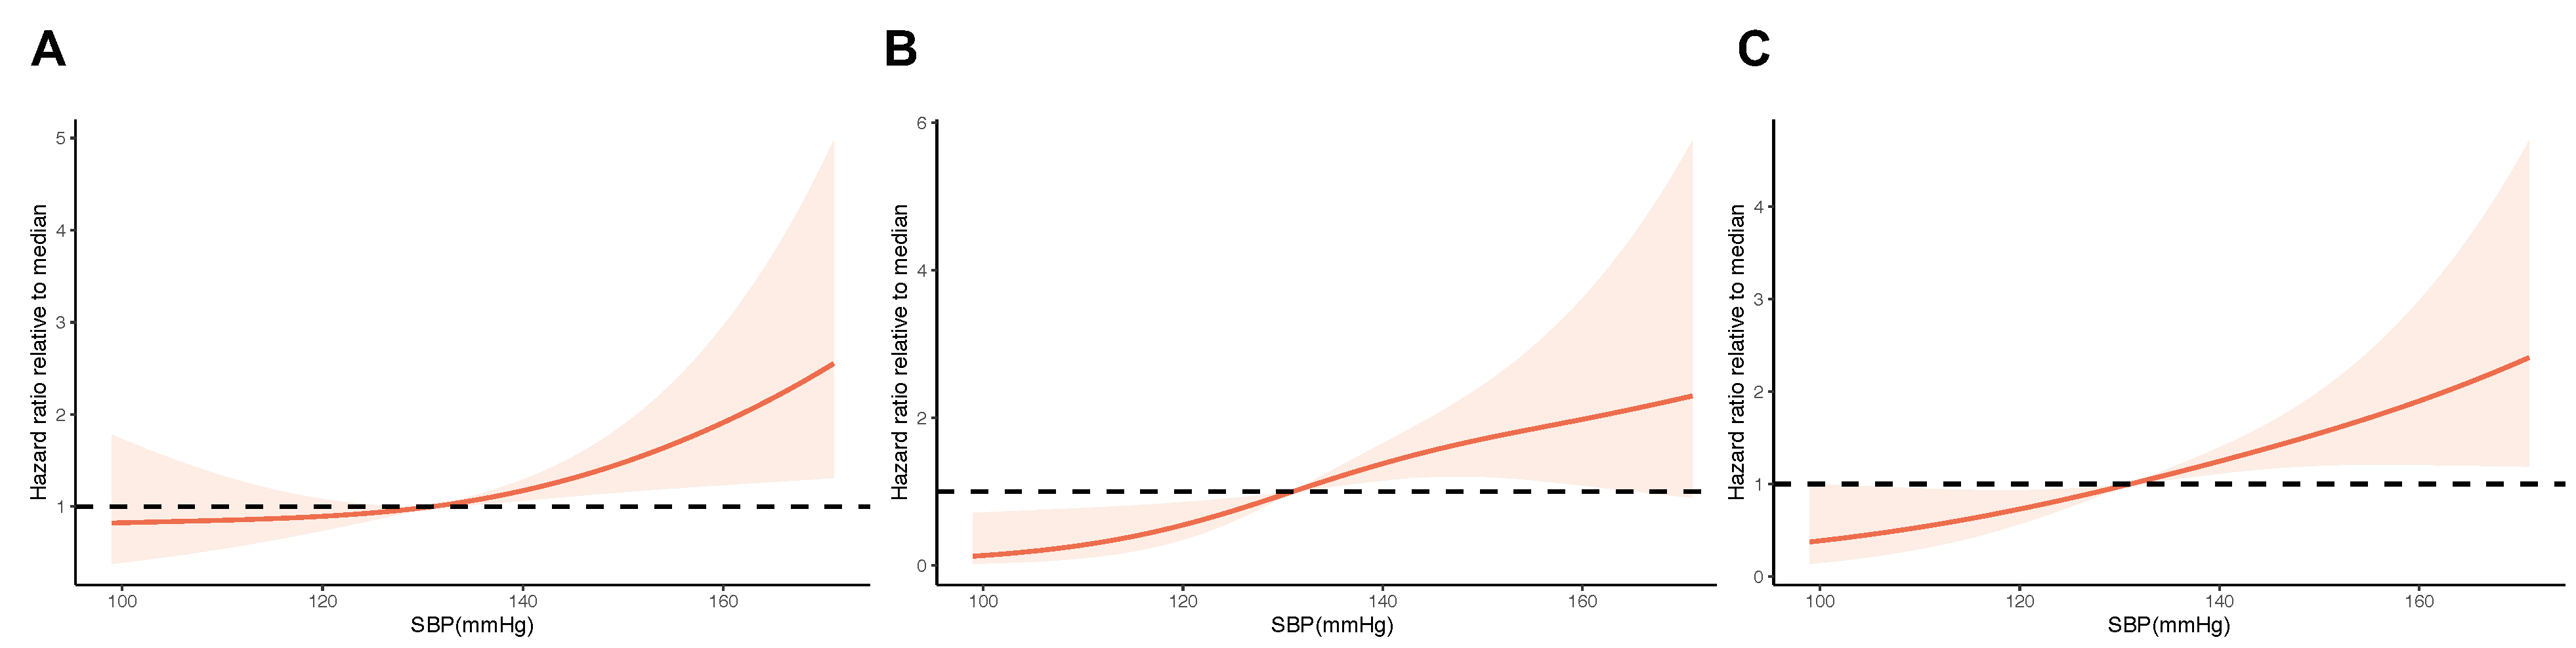
**

**Supplemental Fig. 2.** Nonlinear Cox regression analysis using penalized smoothing splines for association of systolic blood pressure with (A)all-cause mortality, (B)cardiovascular mortality, (C)cardiovascular events. The hazard ratio is represented by the solid line and the 95% CI by the shaded area. The pattern for cardiovascular mortality is more obvious and cardiovascular events than that of all-cause mortality. Abbreviation: SBP, systolic blood pressure.
